# Supplementary material for: Navigating the Digital Frontier: A Conceptual Framework for Data Science and Analytics Integration in Tourism Education and Research
Source: Research Square preprint supplement (doi:10.21203/rs.3.rs-7874079/v1), 2025-10-20
Supplement: Supplementary file 1 [file 02316dae827803148095de28.docx]

**Appendix A:** Data Science and Analytics (DSA) courses introduced in tourism curriculum at various universities and colleges.

**Source:** Author

| **Sr. No.** | **College/University** | **Course/Degree Offered** | **Source/URL** |
| --- | --- | --- | --- |
| 1. | College of Merchandising, Hospitality & Tourism at the University of North Texas. | M.S. in Hospitality & Tourism Data Analytics | https://cmht.unt.edu/hospitality-tourism-data-analytics |
| 2. | The University of Florida | [Certificate] AI and Data Analytics in Tourism, Hospitality and Event Management | https://catalog.ufl.edu/UGRD/colleges-schools/UGHHU/HHU_UCT02/ |
|  |  | Tourism Analytics Specialisation [under MS in Tourism & Hospitality Management] | https://hhp.ufl.edu/academics/ms-tourism/tourism-analytics/ |
| 4. | Queen Margaret University | [Short Course] Introduction to Data Analytics in Hospitality and Tourism | https://www.qmu.ac.uk/study-here/short-courses/short-courses/introduction-to-data-analytics-in-hospitality-and-tourism-short-course/ |
| 5. | University of Central Florida | M.S. in Travel Technology and Analytics | https://www.ucf.edu/degree/travel-technology-and-analytics-ms/ |
| 6. | The Hong Kong Polytechnic University | Elective course on *Smart Tourism & Big Data Analytics* [under Master of Science Scheme in Hospitality and Tourism Management] | https://www.polyu.edu.hk/shtm/study/taught-postgraduate-programmes_v2/master-of-science-scheme-in-hospitality-and-tourism-management/mscpgd-in-international-hospitality-management/ |
| 7. | The University of Surrey | Courses on *data science, data analytics, and business analytics* in UG, PG, and Research courses. | https://www.surrey.ac.uk/school-hospitality-tourism-management |
| 8. | Purdue University | Sports Analytics Program for Tourism Students | Ogbeide et al. (2021) |
